## Addendum: Crosstalk between triple negative breast cancer and microenvironment

Karly Smrekar<sup>1</sup>, Artem Belyakov<sup>1</sup> and Kideok Jin<sup>1</sup>

<sup>1</sup>Department of Pharmaceutical Sciences, Albany College of Pharmacy and Health Science, Albany, NY 12208, USA

*Published:* September 15, 2023

**Copyright:** © 2023 Smrekar et al. This is an open access article distributed under the terms of the [Creative Commons Attribution License](#) (CC BY 3.0), which permits unrestricted use, distribution, and reproduction in any medium, provided the original author and source are credited.

**This article has an addendum:** Research funding was obtained from the Albany College of Pharmacy and Health Sciences, Scholarship of Discovery Fund.

Original article: Oncotarget. 2023; 14:284–293. <https://doi.org/10.18632/oncotarget.28397>
